# Supplementary material for: SNARE protein SNAP25 regulates the chloride-transporter KCC2 in neurons
Source: PubMed Central journal article supplement — iScience. 2024 Oct 11;27(11):111156. doi: 10.1016/j.isci.2024.111156 (PMC11539599; doi:10.1016/j.isci.2024.111156), 2024-10-11
Supplement: mmc1.pdf [file mmc1.pdf]

**Supplemental information**

**SNARE protein SNAP25 regulates  
the chloride-transporter KCC2 in neurons**

**Vineeth Andisseryparambil Raveendran, Melissa Serranilla, Azam  
Asgarihafshejani, Miranda de Saint-Rome, Mariia Cherednychenko, Shanelle  
Mullany, Jennifer A. Mitchell, Jessica C. Pressey, and Melanie A. Woodin**

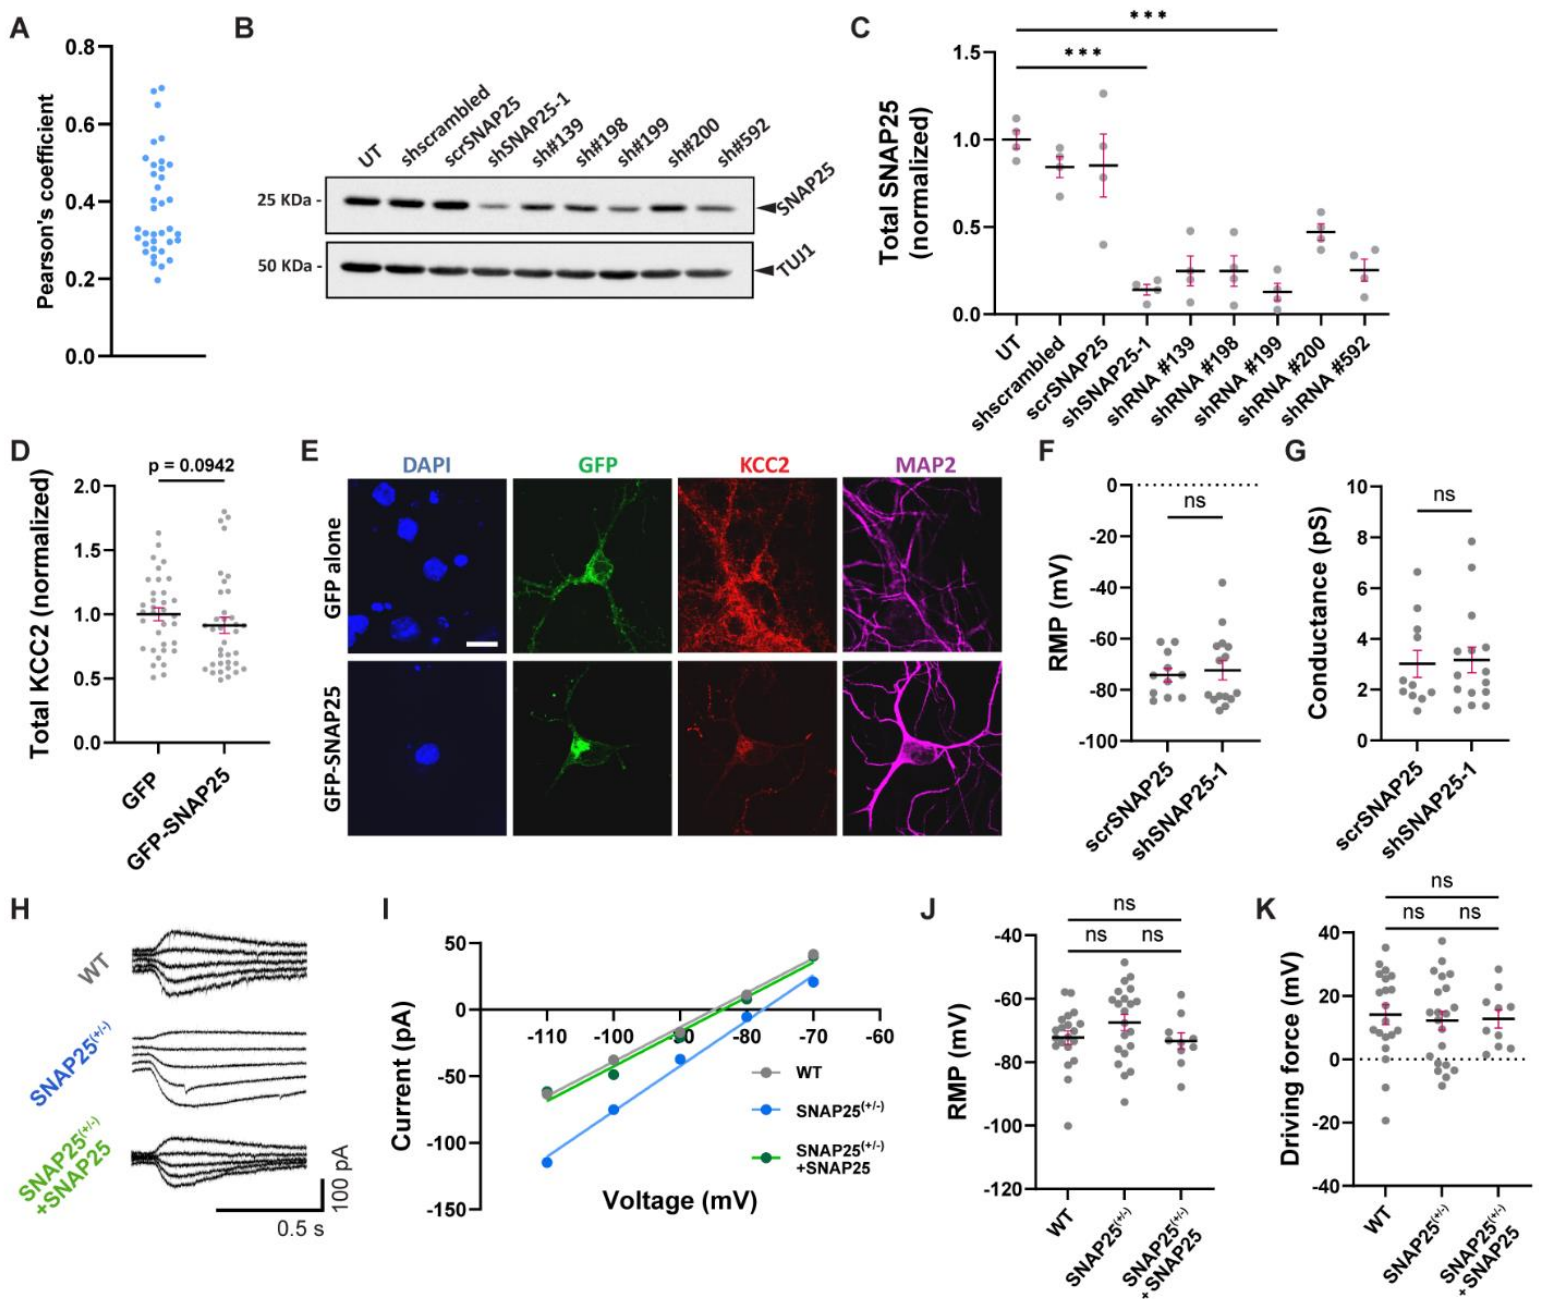

**Figure S1. SNAP25 overexpression did not change total endogenous KCC2 level in neurons. Related to Figure 1 and Figure 2.** **A)** Pearson's correlation coefficient for colocalization of SNAP25 and KCC2 in mouse cortical neurons. Each data point represents a single neuron ( $n=36$ ), and the graph contains data from four independent cultures. **B)** Immunoblot showing total endogenous SNAP25 in neuro-2a cells transfected with scrambled shRNAs (shscrambled, scrSNAP25) or shRNAs targeting SNAP25 (shSNAP25-1, sh#139, sh#198, sh#199, sh#200, sh#592). The blot was probed with the antibodies indicated on the right. **C)** Summary graph ( $n=4$ ) corresponding to (B), normalized to un-transfected cells (UT). Statistical significance was determined using Brown-Forsythe and Welch ANOVA tests followed by Dunnett's T3 multiple comparisons test. Asterisks denote significance from UT, and only statistical significance for shSNAP25-1 and sh#199 (shSNAP25-2) are depicted in the figure. **D)** Summary graph of total endogenous KCC2 fluorescence (normalized to volume) from primary mouse cortical neurons transfected with GFP alone ( $n = 34$ ) or GFP-SNAP25 ( $n = 36$ ). **E)** Representative images (maximum intensity projection) from neurons corresponding to (D), immunostained with anti-KCC2 (red) and anti-MAP2 (magenta) antibodies. Green fluorescence (GFP) represents transfected neurons. Scale bar, 10  $\mu\text{m}$ . Statistical significance was determined using Mann-Whitney test. **F)** Summary graph showing resting membrane potential and **G)** conductance of neurons transduced with scrSNAP25 ( $n=11$ ) or shSNAP25-1 ( $n=15$ ).  $n$  values represent individual cells obtained from three independent cultures. Statistical significance for (F) and (G) was determined using an unpaired t-test with Welch's correction. **H)** Sample current traces, **I)** representative current-voltage plot, **J)** resting membrane potential, and **K)**  $\text{Cl}^-$  driving force for WT neurons ( $n=20$ ), SNAP25<sup>+/-</sup> neurons ( $n=21$ ) and SNAP25<sup>+/-</sup> neurons with exogenous SNAP25 transduction ( $n=10$ ).  $n$  values indicate cells obtained from cultures of at least five individual pups. All graphs represent mean  $\pm$  SEM. ns - not significant, \*\*\* $p < 0.001$ .

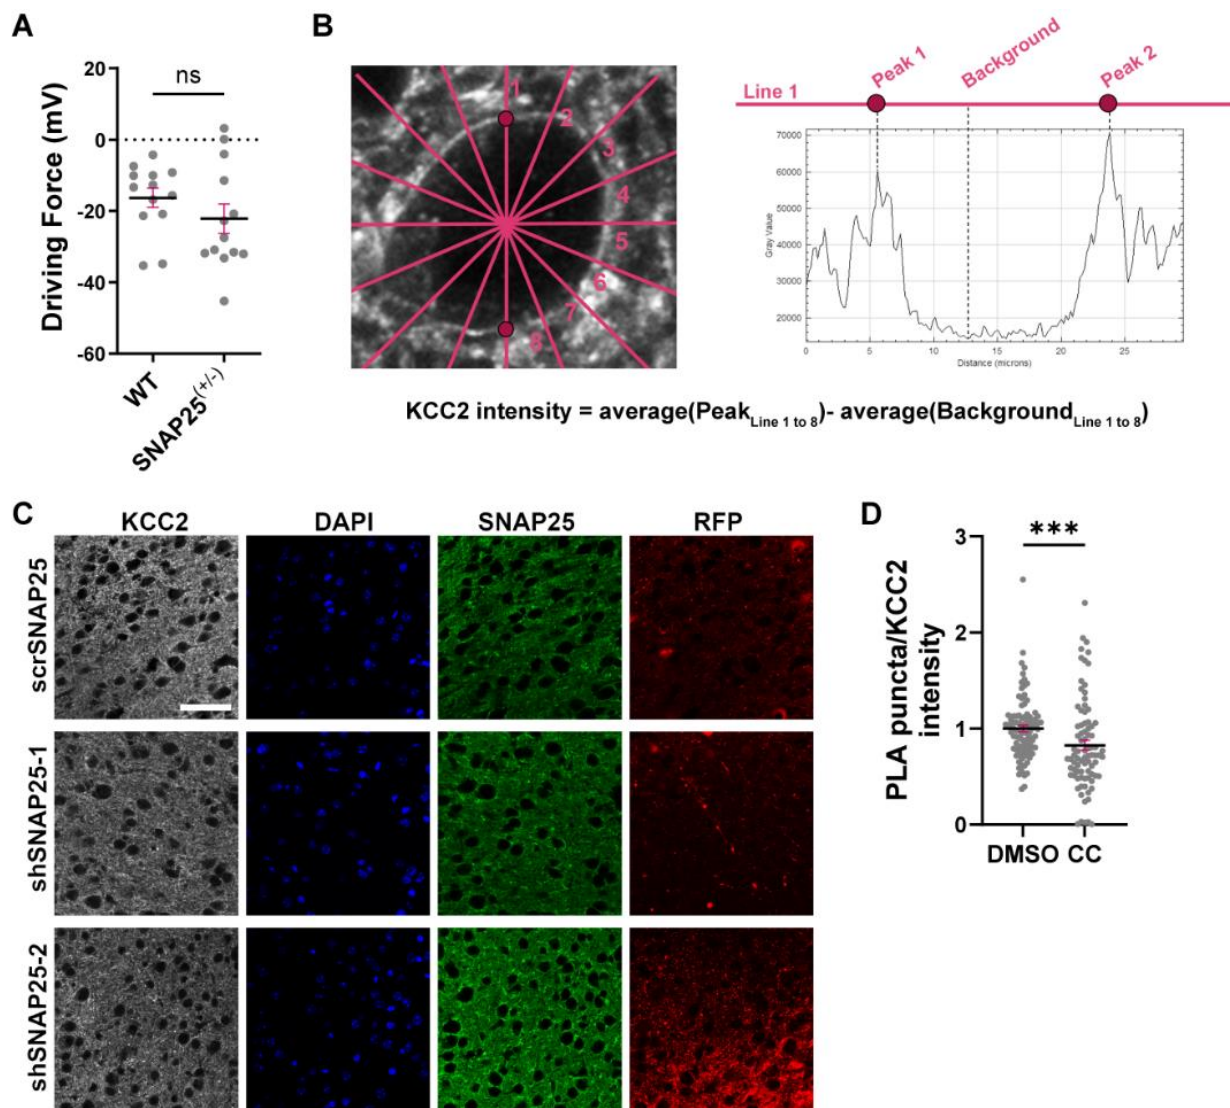

**Figure S2. SNAP25 knockdown reduced KCC2 in mice. Related to Figure 3 and Figure 4.** **A)** Driving force for Cl<sup>-</sup> from SNAP25<sup>(+/-)</sup> mice (n=13) and WT littermates (n=18). n values represent individual cells obtained from at least four animals. Statistical significance was determined using an unpaired t-test with Welch's correction. **B)** Schematic figure showing the method used to quantify KCC2 in brain slices **C)** Representative images (maximum intensity projection) at a lower magnification from C57BL/6 mice cortex transduced with scrambled shRNA (scrSNAP25) or SNAP25 shRNA (shSNAP25-1, shSNAP25-2), and immunostained for KCC2 (gray) and SNAP25 (green). Scale bar, 50  $\mu$ m. **D)** Summary graph of PLA puncta intensity (KCC2-SNAP25 interaction) in neuro-2a cells transfected with KCC2 and treated with DMSO (n=92) or chelerythrine chloride (CC, n=84). n values indicate individual cells from three independent coverslips. Statistical significance was determined using Mann-Whitney test. ns- not significant, \*\*\*p<0.001.

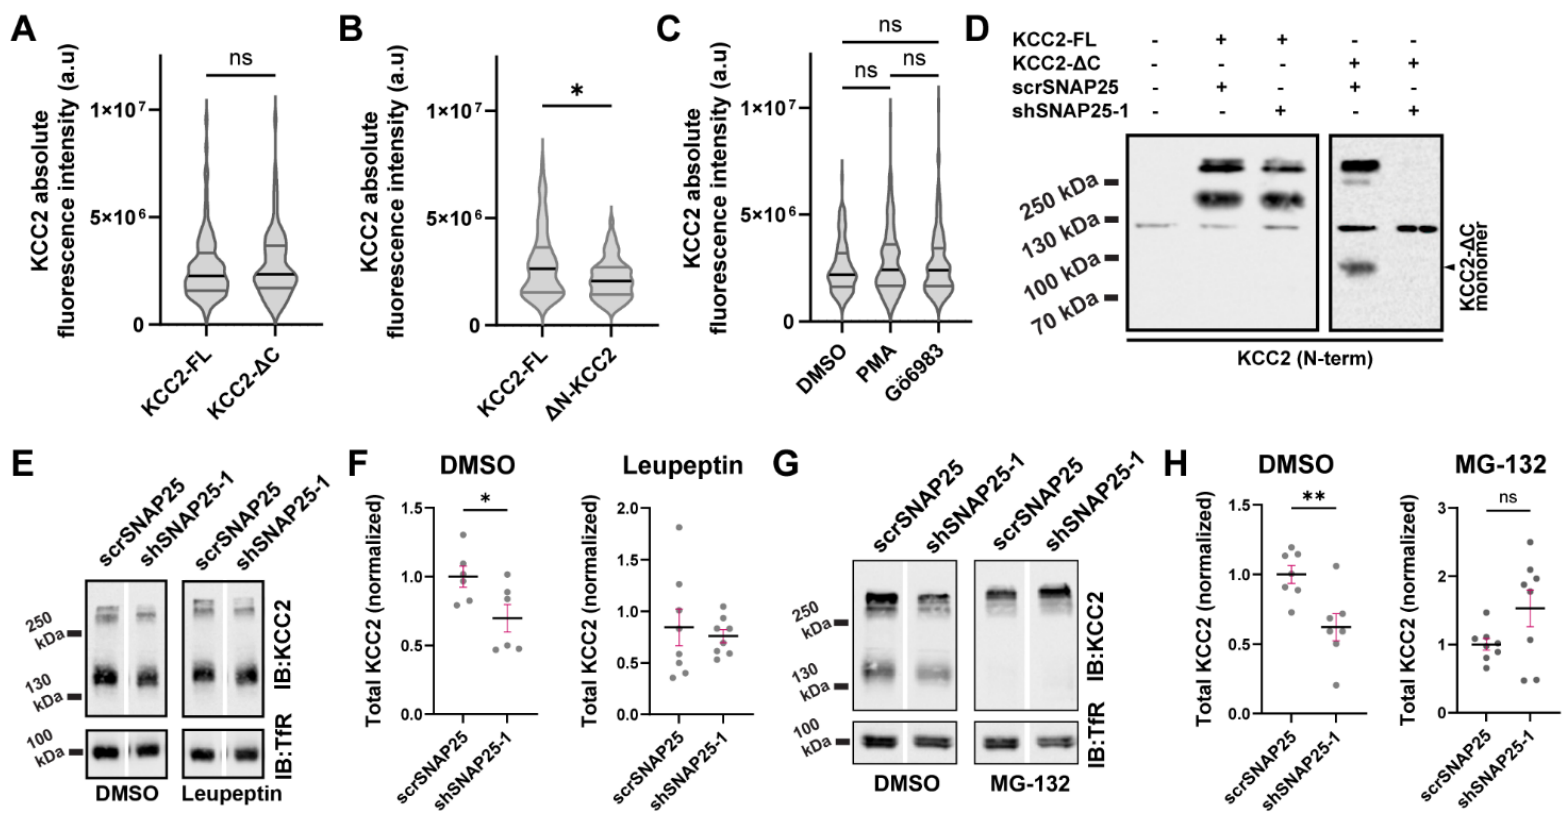

**Figure S3. SNAP25 knockdown reduces KCC2 through lysosomal-proteasomal degradation. Related to Figure 5.** **A)** Summary plot showing absolute KCC2 fluorescence intensity in neuro-2a cells (selected for quantification in Figure 5 C) transfected with KCC2-FL (n=99) or KCC2-ΔC (n=80) cDNA. n values indicate individual cells from four independent coverslips. Statistical significance was determined using Mann-Whitney test. **B)** Summary plot showing absolute KCC2 fluorescence intensity in neuro-2a cells (selected for quantification in Figure 5 E) transfected with KCC2-FL (n=69) or ΔN-KCC2 (n=63) cDNA. n values indicate individual cells from three independent coverslips. Statistical significance was determined using Mann-Whitney test. **C)** Summary plot showing absolute KCC2 fluorescence intensity in neuro-2a cells (selected for quantification in Figure 4 J) transfected with KCC2 cDNA and treated with DMSO (n=106), PMA (n=141) or Go6983 (n=134). n values indicate individual cells from four independent coverslips. Statistical significance was determined using Kruskal-Wallis test and Dunn's multiple comparisons test. **D)** Representative immunoblot showing KCC2-FL and KCC2-ΔC in neuro-2a cells co-transfected with scrambled (scrSNAP25) or SNAP25 shRNA (shSNAP25-1), and probed with N-terminus directed anti-KCC2 antibody. **E)** Immunoblot and **G)** summary graph showing total KCC2 abundance in neuro-2a cells transfected with KCC2 and scrSNAP25 or shSNAP25-1, and treated with DMSO (scrSNAP25, n=6; shSNAP25-1, n=6) or Leupeptin (scrSNAP25, n=8; shSNAP25-1, n=8). Statistical significance was determined using unpaired t-test. **H)** Immunoblot and **I)** summary graph showing total KCC2 abundance in neuro-2a cells transfected with KCC2 and scrSNAP25 or shSNAP25-1, and treated with DMSO (scrSNAP25, n=7; shSNAP25-1, n=7) or MG-132 (scrSNAP25, n=8; shSNAP25-1, n=8). Statistical significance was determined using unpaired t-test. The violin plots show median with quartiles and all other graphs represent mean  $\pm$  SEM. ns - not significant, \*p<0.05, \*\*p<0.01.

**Table S1. Complete details and dilutions of all antibodies used in this study are as follows. Related to STAR Methods.**

| Antibody           | Catalog #   | Manufacturer              | Dilution (or amount) and corresponding figures                 |                                                                                    |                                       |
|--------------------|-------------|---------------------------|----------------------------------------------------------------|------------------------------------------------------------------------------------|---------------------------------------|
|                    |             |                           | Immunoblot (IB)                                                | Immunofluorescence (IF)/ Proximity ligation assay (PLA)                            | Immunoprecipitation (IP)              |
| KCC2 (rabbit)      | 07-432      | Sigma-Aldrich             | 1:2000 (Figure 1 A, C, E; 3 B; 4 A, F; 5 G, H; 6 A, B, C, D)   | 1:1000 (Figure 1 B; 2 A)<br>1:400 (Figure 3 J)<br>1:500 (Figure 4 D, I, L, N; 5 D) | N/A                                   |
| KCC2 (mouse)       | 75-013      | NeuroMab                  | N/A                                                            | N/A                                                                                | 5µg/1000µg total protein (Figure 1 A) |
| KCC2 (rabbit)      | ab97502     | Abcam                     | 1:2000 (Figure 5 F)                                            | 1:500 (Figure 5 B)                                                                 | N/A                                   |
| SNAP25 (mouse)     | 111011      | Synaptic Systems          | N/A                                                            | 1:1000 (Figure 1 B; 2 A)<br>1:500 (Figure 4 I, L, N; 5 B, D)                       | N/A                                   |
| SNAP25 (rabbit)    | ab5666      | Abcam                     | 1:2000 (Figure 1 A, C, E; 3 B)                                 | N/A                                                                                | N/A                                   |
| b-Actin (rabbit)   | 4967S       | Cell Signaling Technology | 1:2000 (Figure 1 C)                                            | N/A                                                                                | N/A                                   |
| TfR (mouse)        | 13-6800     | Invitrogen                | 1:3000-5000 (Figure 1 E; 3 B; 4 A, F; 5 F, G, H; 6 A, B, C, D) | N/A                                                                                | N/A                                   |
| MAP2 (chicken)     | AB5543      | EMD Millipore             | N/A                                                            | 1:2000 (Figure 1 B)                                                                | N/A                                   |
| TUJ1 (mouse)       | 801202      | BioLegend                 | 1:5000 (Figure 3 B; 4 A, F; 5 F, G)                            | N/A                                                                                | N/A                                   |
| FLAG (mouse)       | F1804       | Sigma-Aldrich             | N/A                                                            | 1:500 (Figure 4 D)                                                                 | N/A                                   |
| Purified Mouse IgG | 43-637-0010 | Antibodies Inc            | N/A                                                            | N/A                                                                                | 5µg/1000µg total protein (Figure 1 A) |
